# Supplementary material
Source: PubMed Central journal article supplement (PMC7004846)
Supplement: NIHMS1545957-supplement-1.pdf [file NIHMS1545957-supplement-1.pdf]

**Structure, Volume 28**

**Supplemental Information**

**Structure and Ligand-Binding Properties  
of the O Antigen ABC Transporter  
Carbohydrate-Binding Domain**

**Yunchen Bi and Jochen Zimmer**

**Figure S1, related to Figures 1 and 2**

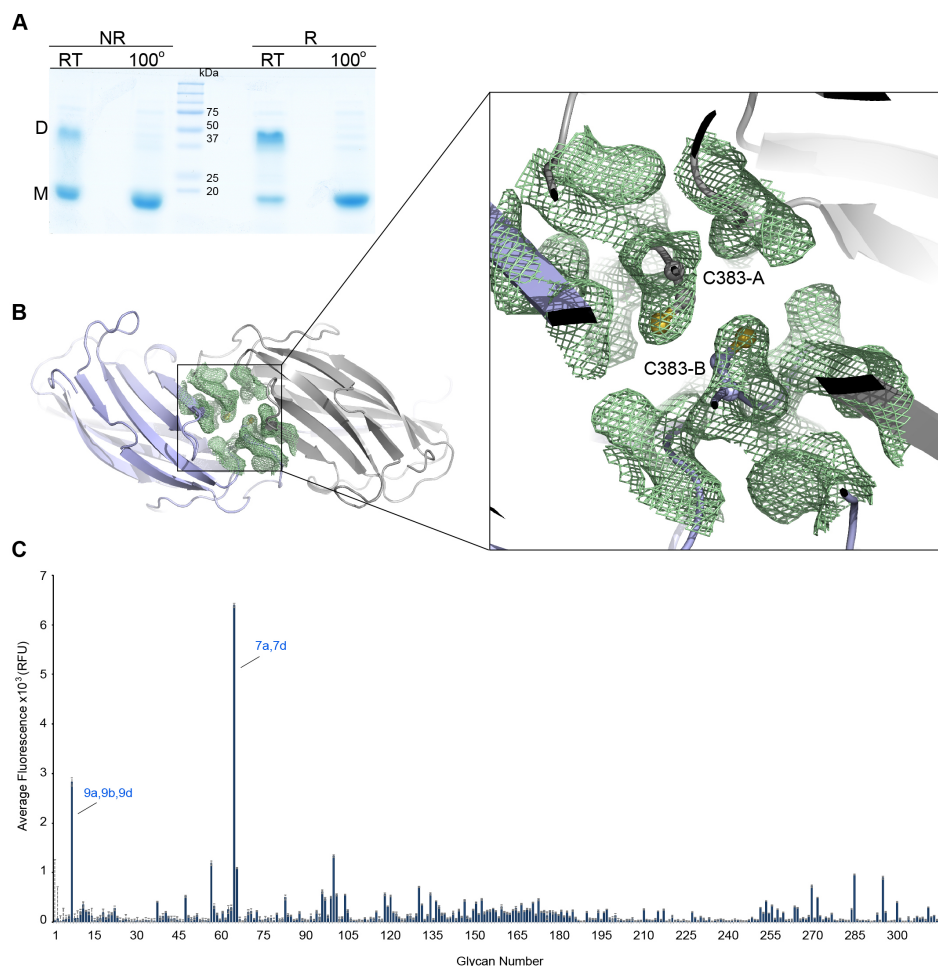

Figure S1: The *Aquifex aeolicus* Wzt carbohydrate-binding domain forms a stable dimer. (A) SDS-PAGE analysis of purified AaCBD. The protein was analyzed under non-reducing (NR) and reducing (R) conditions. Prior to electrophoresis, the sample was incubated either at room temperature or 100°C for 10 min. CBD monomers (M) and dimers (D) are indicated. (B) Cysteine 383 at the CBD dimer interface is not oxidized. Shown is the SigmaA-weighted 2FoFc electron density contoured at 1.2 $\sigma$  for residues at the dimer interface. The density does not suggest disulfide bond formation between Cys383 in chains A and B. We cannot exclude that an existing disulfide bond was reduced during data collection. (C) Microbial Glycan Array binding assay. The data shown were obtained under identical conditions to those presented in Figure 2 but at a lower AaCBD concentration of 5 $\mu$ g/mL.

**Table S1, related to STAR Methods**

|                                                         | <b>Wzt-CBD long (235-395)</b>    | <b>Wzt-CBD short (245-395)</b> |
|---------------------------------------------------------|----------------------------------|--------------------------------|
| <b>Data collection</b>                                  |                                  |                                |
| Space group                                             | P4 <sub>1</sub> 2 <sub>1</sub> 2 | P6 <sub>3</sub>                |
| Cell dimensions                                         |                                  |                                |
| <i>a</i> , <i>b</i> , <i>c</i> (Å)                      | 107.50, 107.50, 327.33           | 128.35, 128.35, 45.16          |
| $\alpha$ , $\beta$ , $\gamma$ (°)                       | 90, 90, 90                       | 90, 90, 120                    |
| Resolution (Å)                                          | 24.86-3.55<br>(3.80-3.55)*       | 28.64-2.65<br>(2.78-2.65)*     |
| <i>R</i> <sub>merge</sub>                               | 0.43(2.27)                       | 0.20(1.14)                     |
| <i>R</i> <sub>pim</sub>                                 | 0.12(0.72)                       | 0.06(0.36)                     |
| CC <sub>1/2</sub> <sup>^</sup>                          | 0.989(0.632)                     | 0.988(0.731)                   |
| Mean <i>I</i> / <i>sI</i>                               | 7.3(1.5)                         | 6.9(1.5)                       |
| Completeness (%)                                        | 99.7(100.0)                      | 99.8 (100.0)                   |
| Redundancy                                              | 14.5(10.3)                       | 9.2 (9.5)                      |
| <b>Refinement</b>                                       |                                  |                                |
| Resolution (Å)                                          |                                  | 28.64-2.65                     |
| No. reflections                                         |                                  |                                |
| Total                                                   |                                  | 12535                          |
| <i>R</i> <sub>free</sub>                                |                                  | 614                            |
| <i>R</i> <sub>work</sub> / <i>R</i> <sub>free</sub> (%) |                                  | 18.0/23.9                      |
| No. atoms                                               |                                  |                                |
| Chain A                                                 |                                  | 1202                           |
| Chain B                                                 |                                  | 1170                           |
| Glycerol                                                |                                  | 28                             |
| <i>B</i> -factors (Å <sup>2</sup> )                     |                                  |                                |
| Chain A                                                 |                                  | 67.6                           |
| Chain B                                                 |                                  | 77.1                           |
| Glycerol                                                |                                  | 89                             |
| R.m.s deviations                                        |                                  |                                |
| Bond lengths (Å)                                        |                                  | 0.009                          |
| Bond angles (°)                                         |                                  | 1.07                           |

\* Values in parentheses refer to the highest-resolution shell.

<sup>^</sup> Correlation between intensities from random half-data sets (Karplus and Diederichs, 2012).
